# Supplementary material for: Experimental Comparison of Primary and hiPS-Based In Vitro Blood–Brain Barrier Models for Pharmacological Research
Source: MDPI journal article supplement (doi:10.3390/pharmaceutics14040737), 2022-03-29
Supplement: s1 [file s1]

# Supplementary Materials: Experimental Comparison of Primary and hiPS-Based In Vitro Blood–Brain Barrier Models for Pharmacological Research

Karin Danz, Tara Höcherl, Sascha Lars Wien, Lena Wien, Hagen von Briesen and Sylvia Wagner

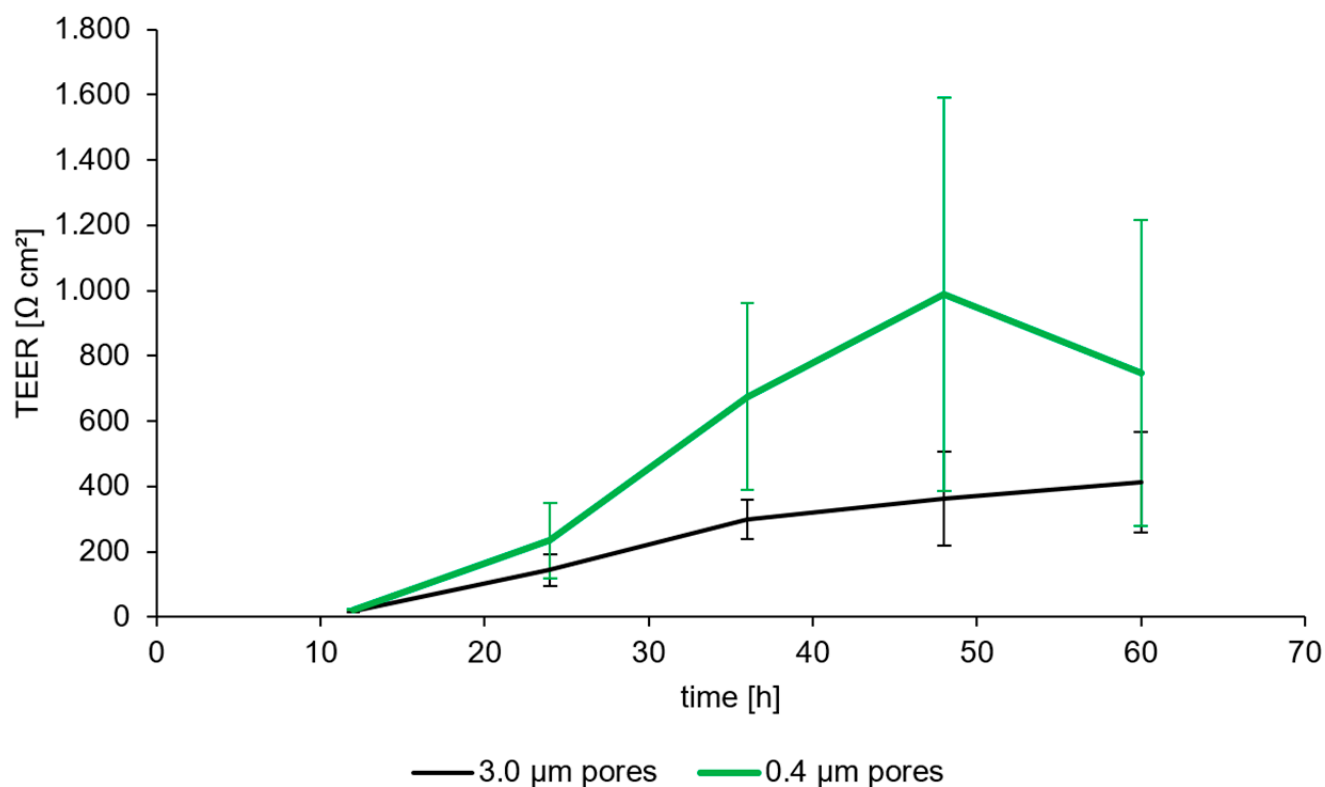

**Figure S1.** TEER development in reaction to membrane pore size. After 8 days of differentiation hiPS-BCEC were seeded on collagen IV-fibronectin-coated membrane inserts with 3.0 µm pore size (black line) or 0.4 µm pore size (green line) and TEER measured continuously. Data shows the mean ± S.D. in 12 h-intervals from at least three biological replicates.
